# Supplementary material
Source: publisher figshare collection journal article supplement (https://gsapubs.figshare.com/ndownloader/files/22410123)
Supplement: Supplementary file 4 [file 22410123]

Archive with 3 entries (3 files):
- SOM 3 vertical separation methods submit.pdf
- SOM 1 Thackray Staley submit.pdf
- SOM 2 Thackray Teton fault maps 012516.pdf
