# Supplementary material
Source: publisher figshare collection journal article supplement (https://gsapubs.figshare.com/ndownloader/files/22410123)

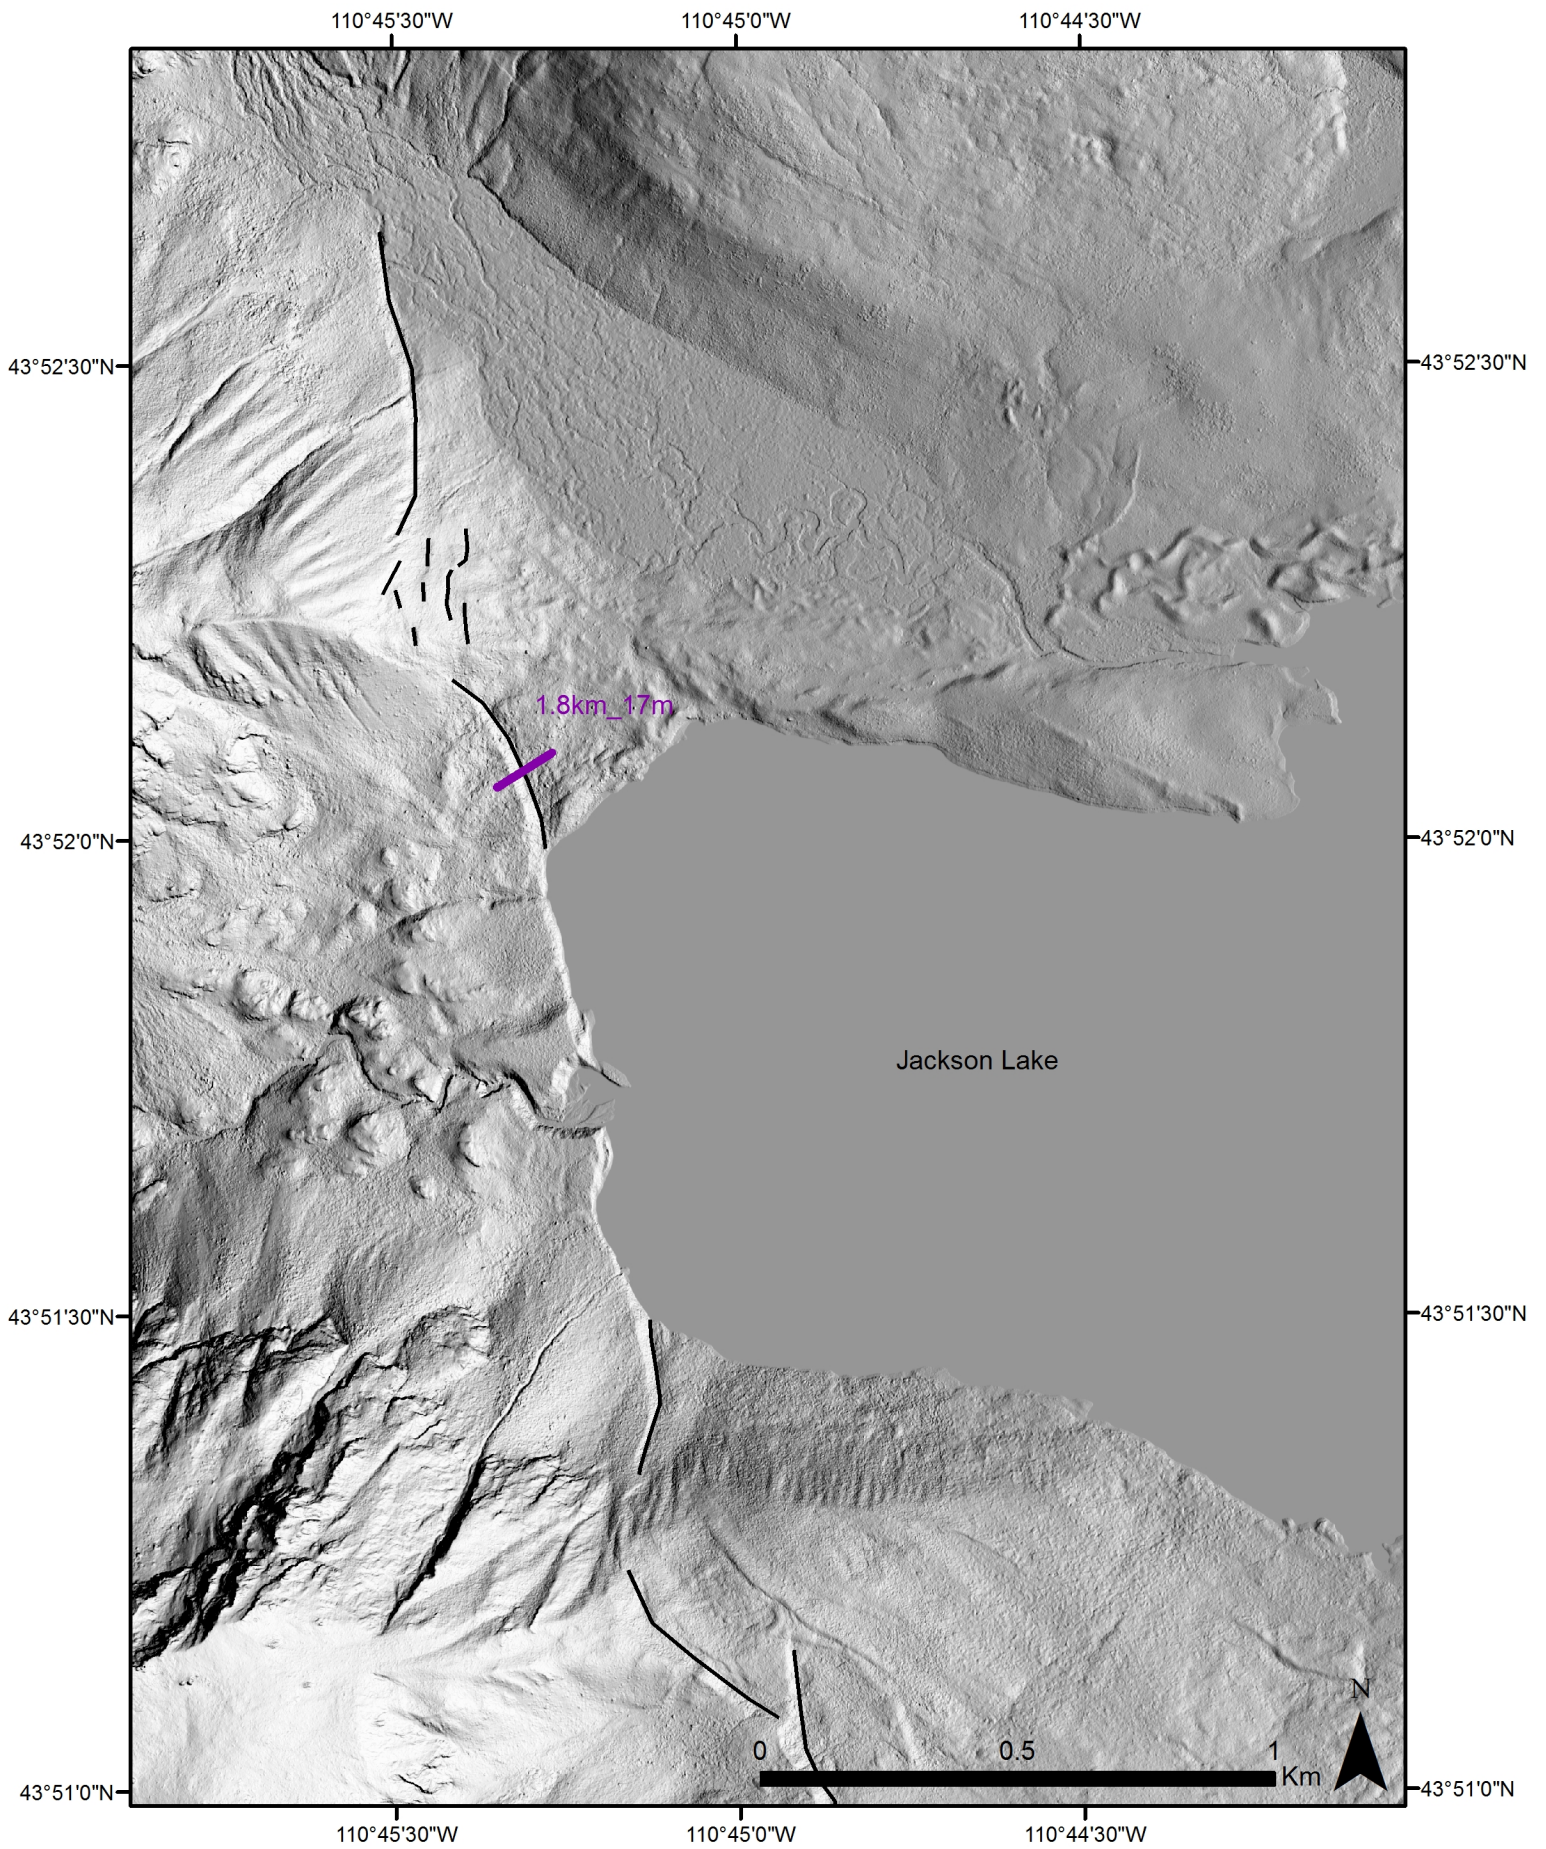



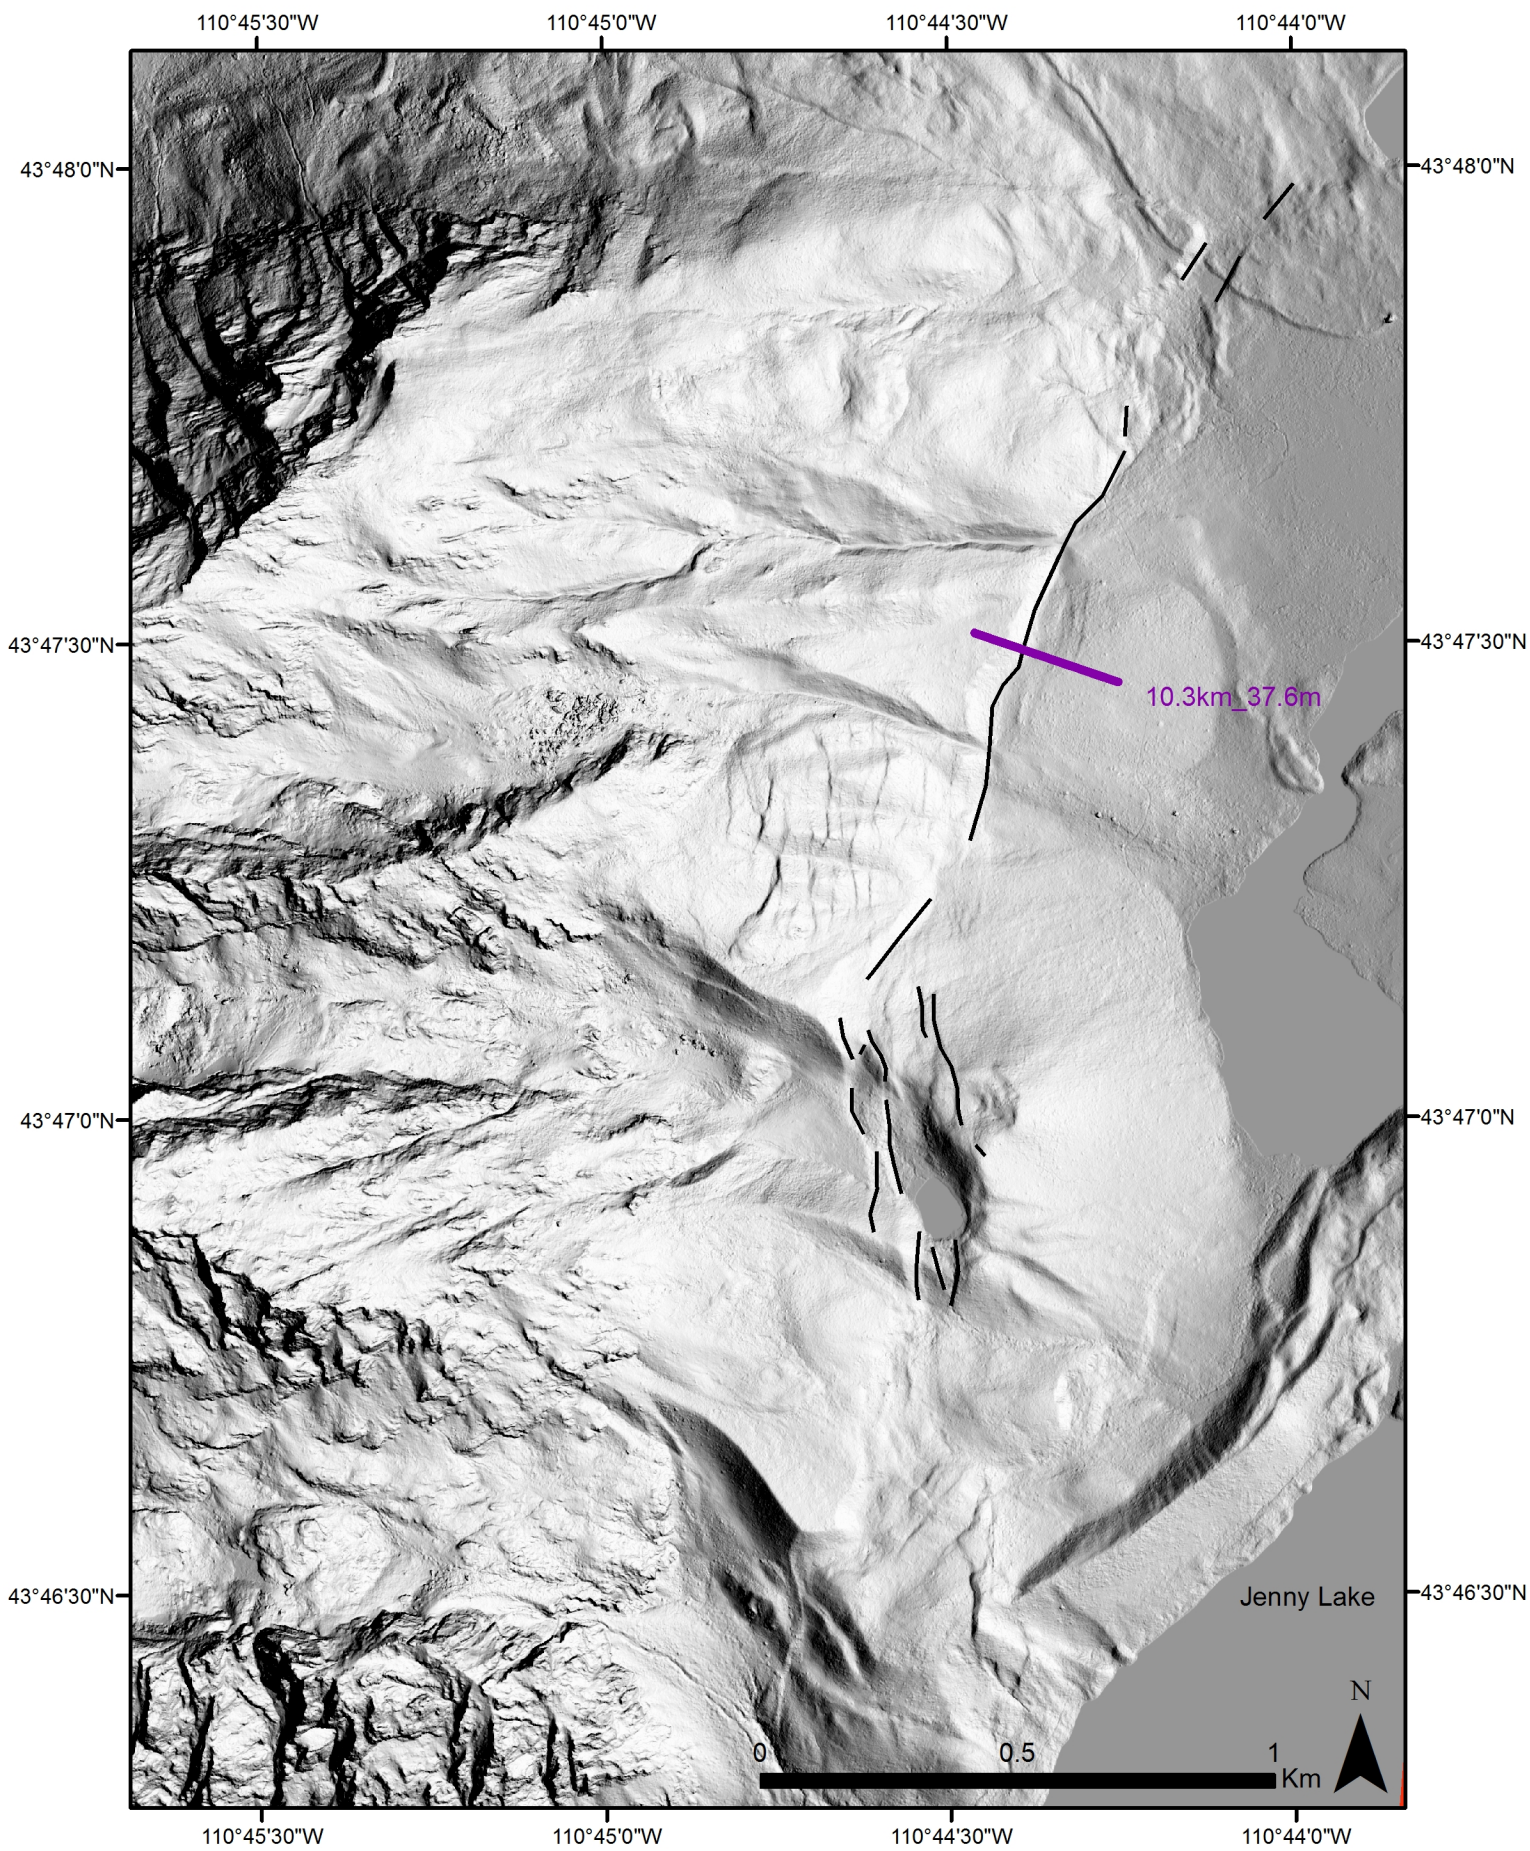



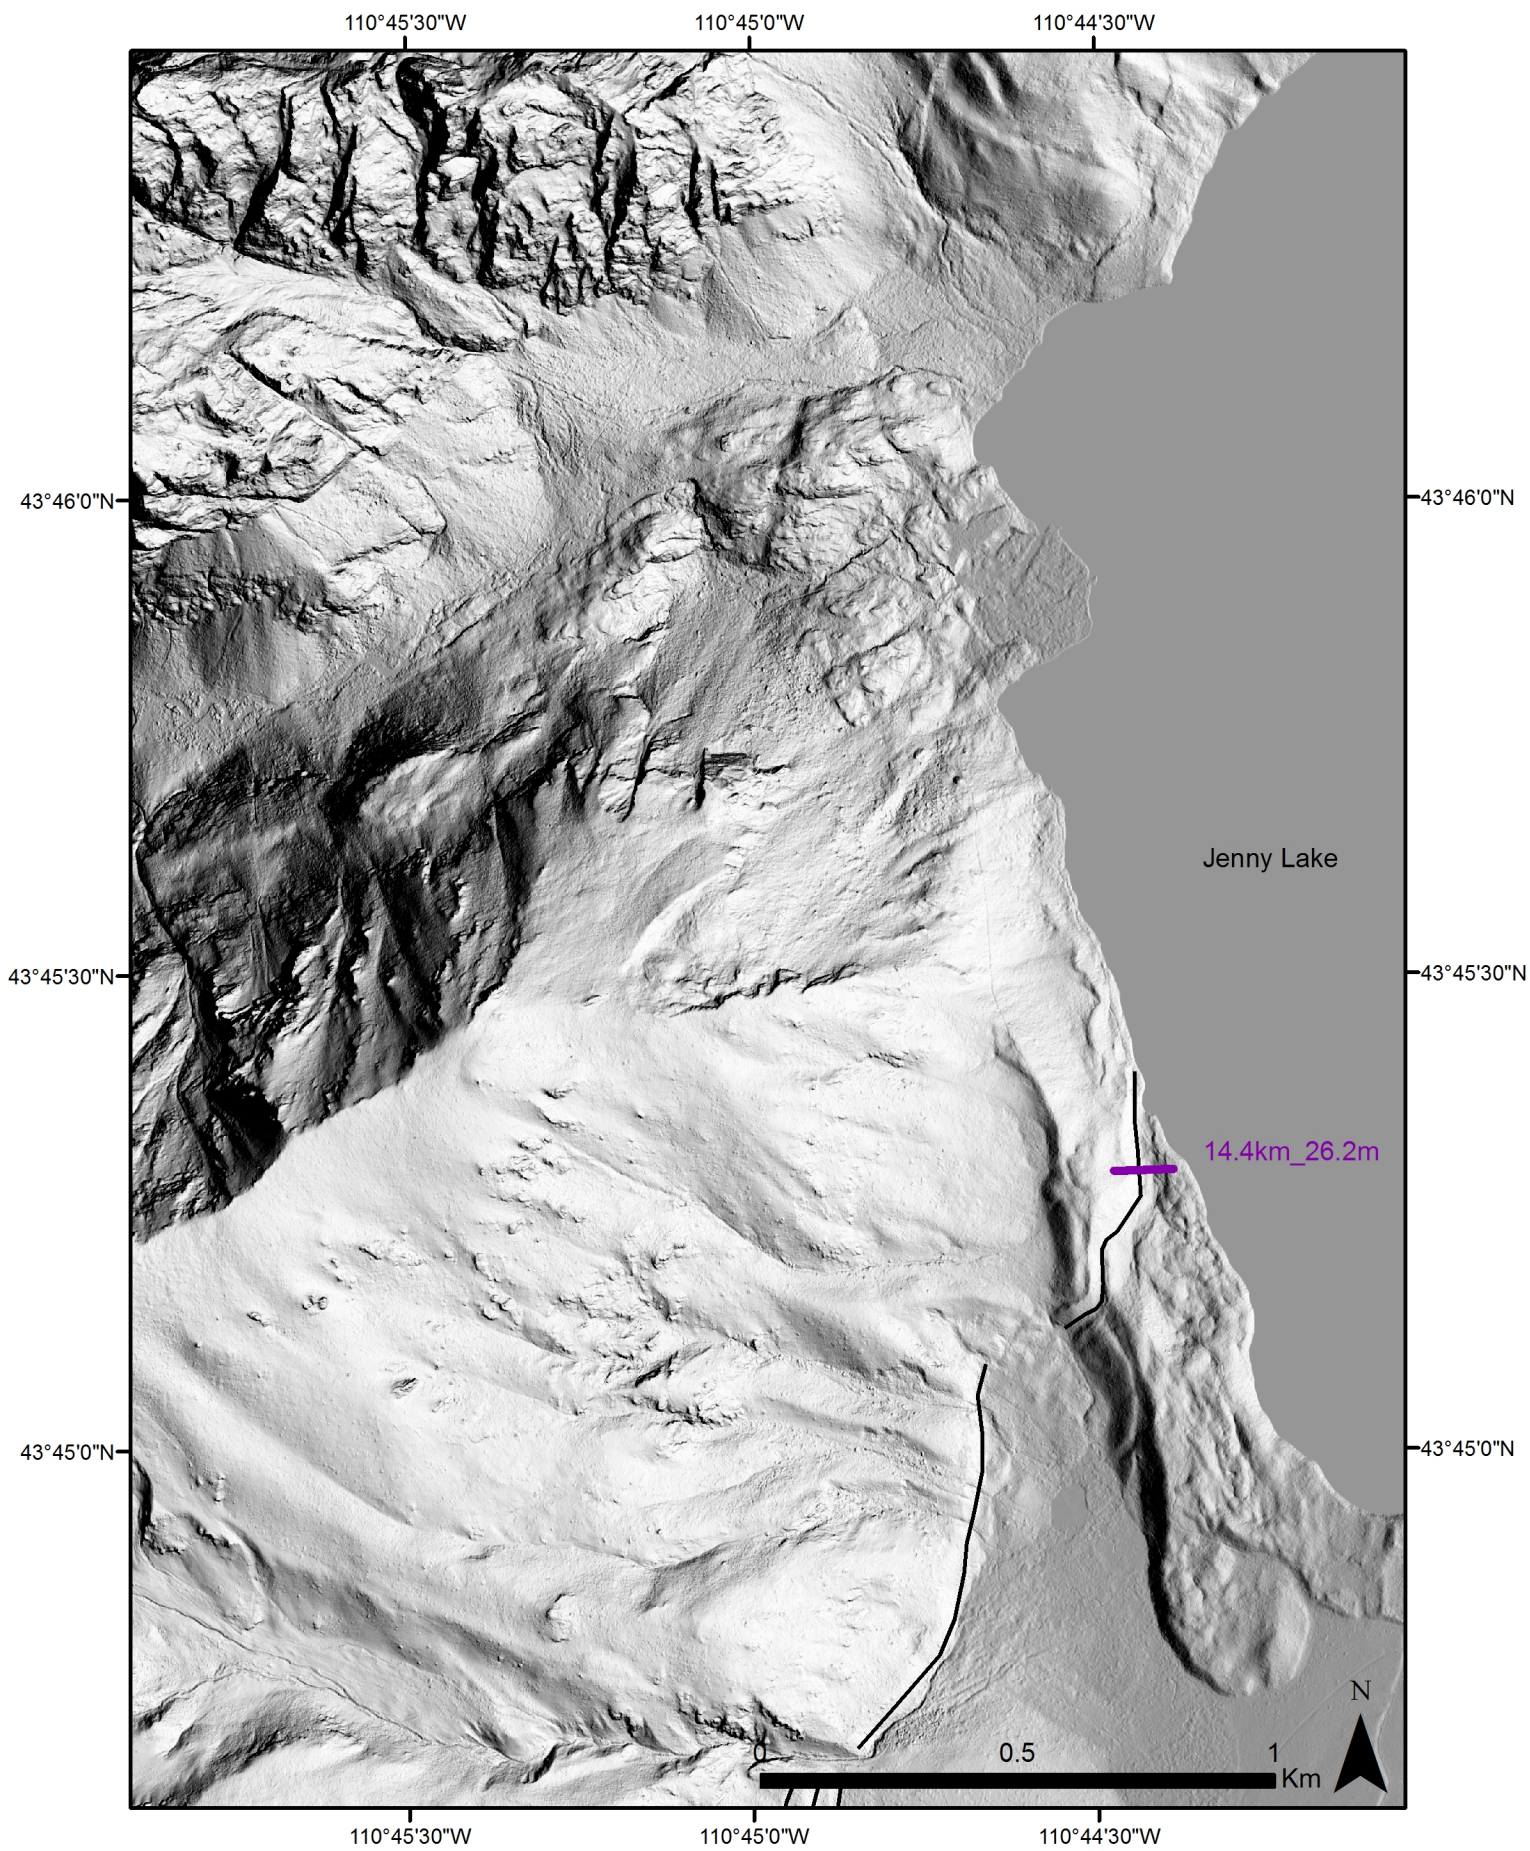



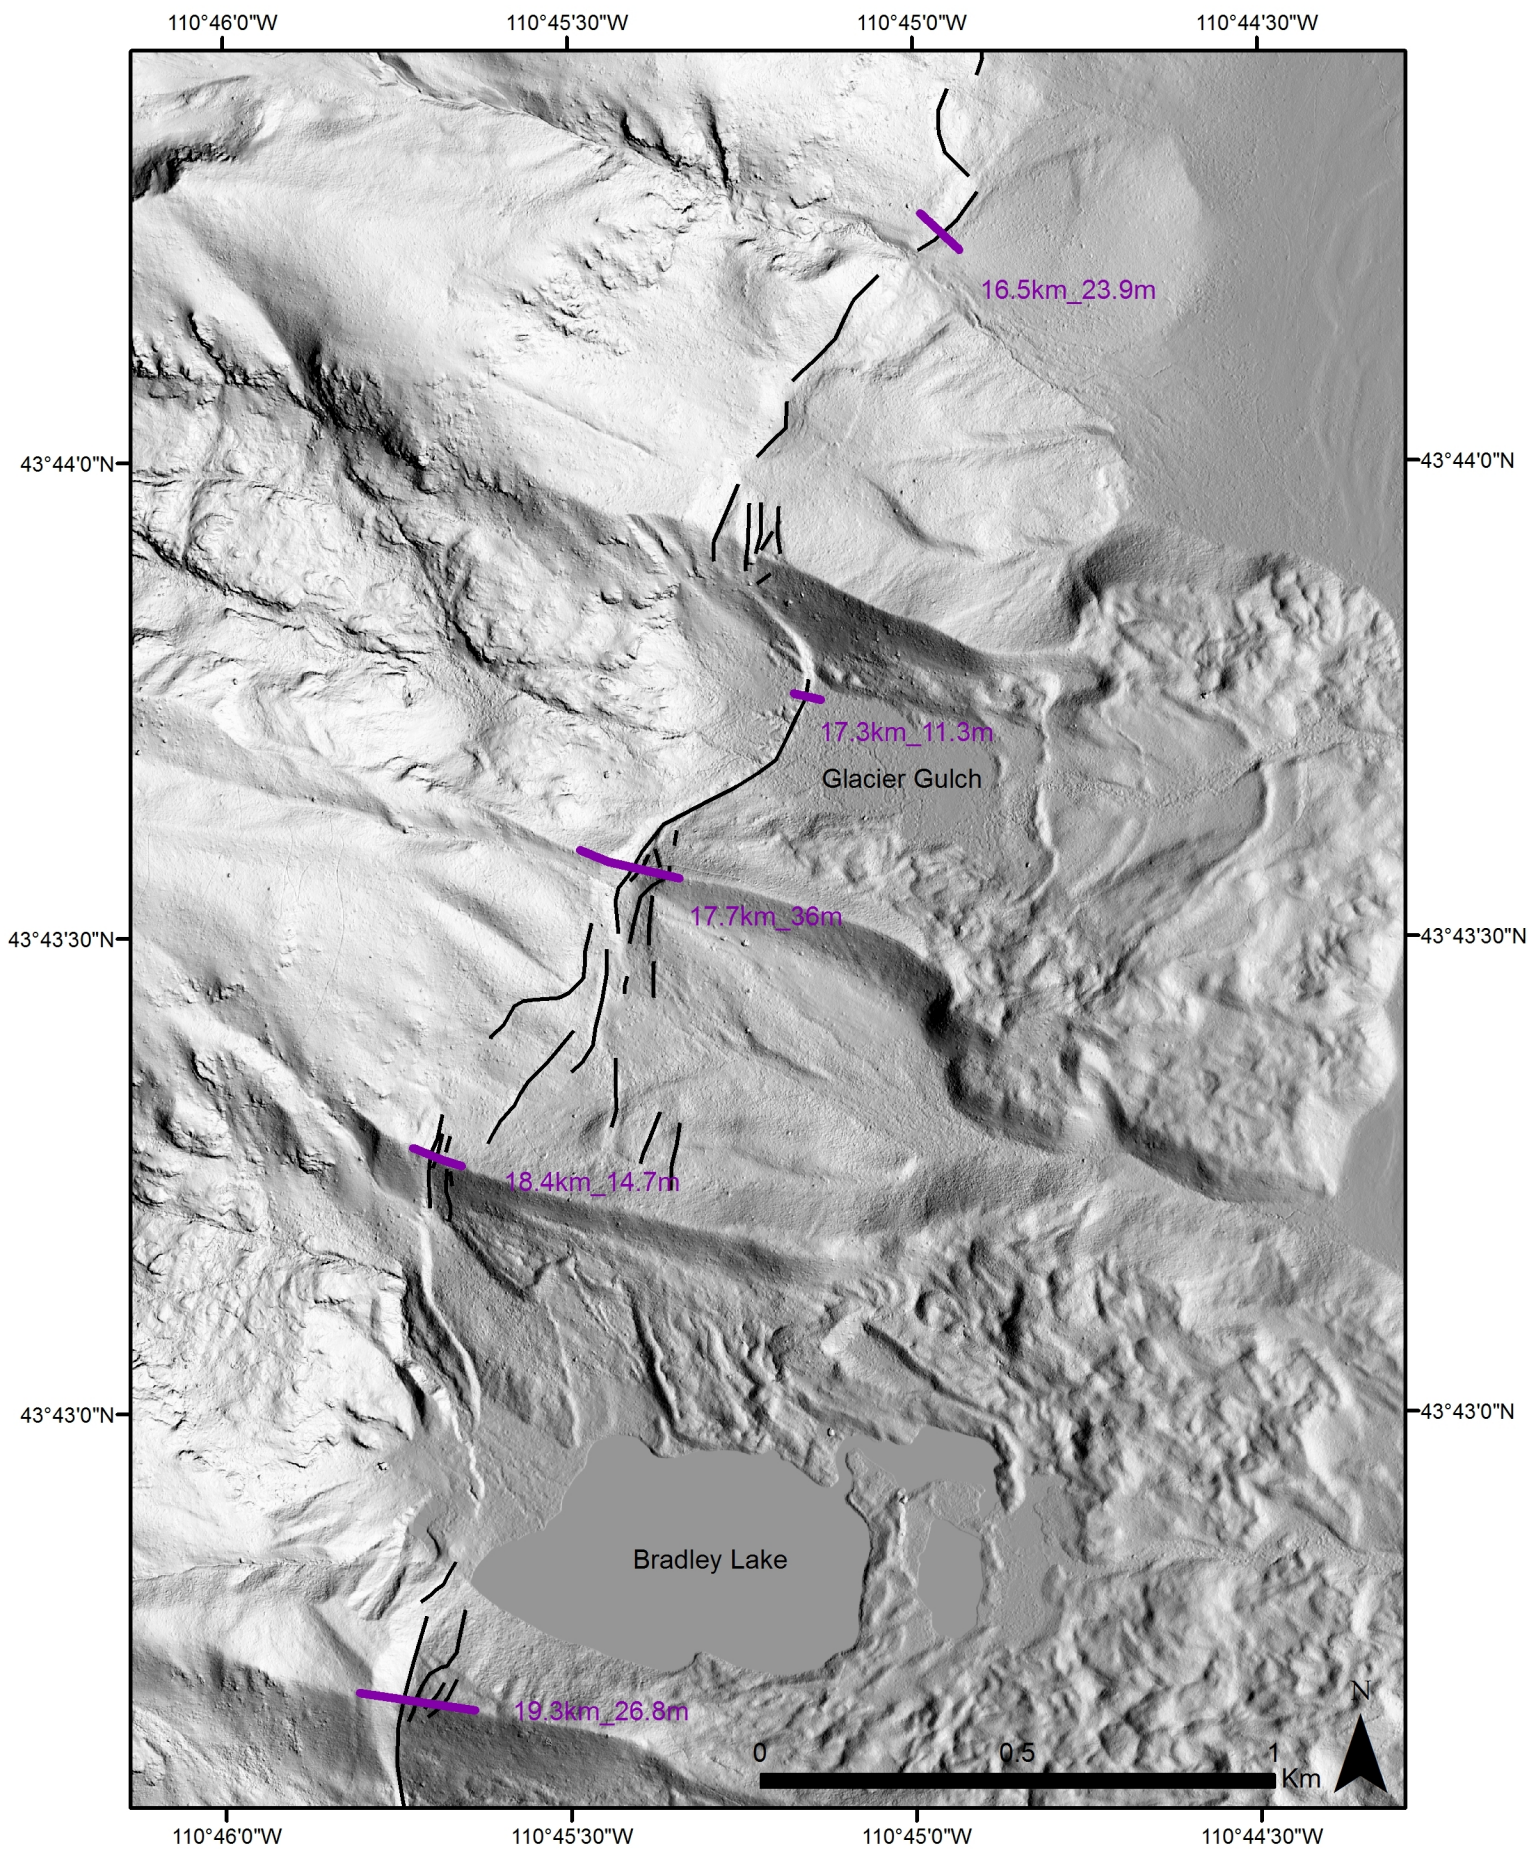



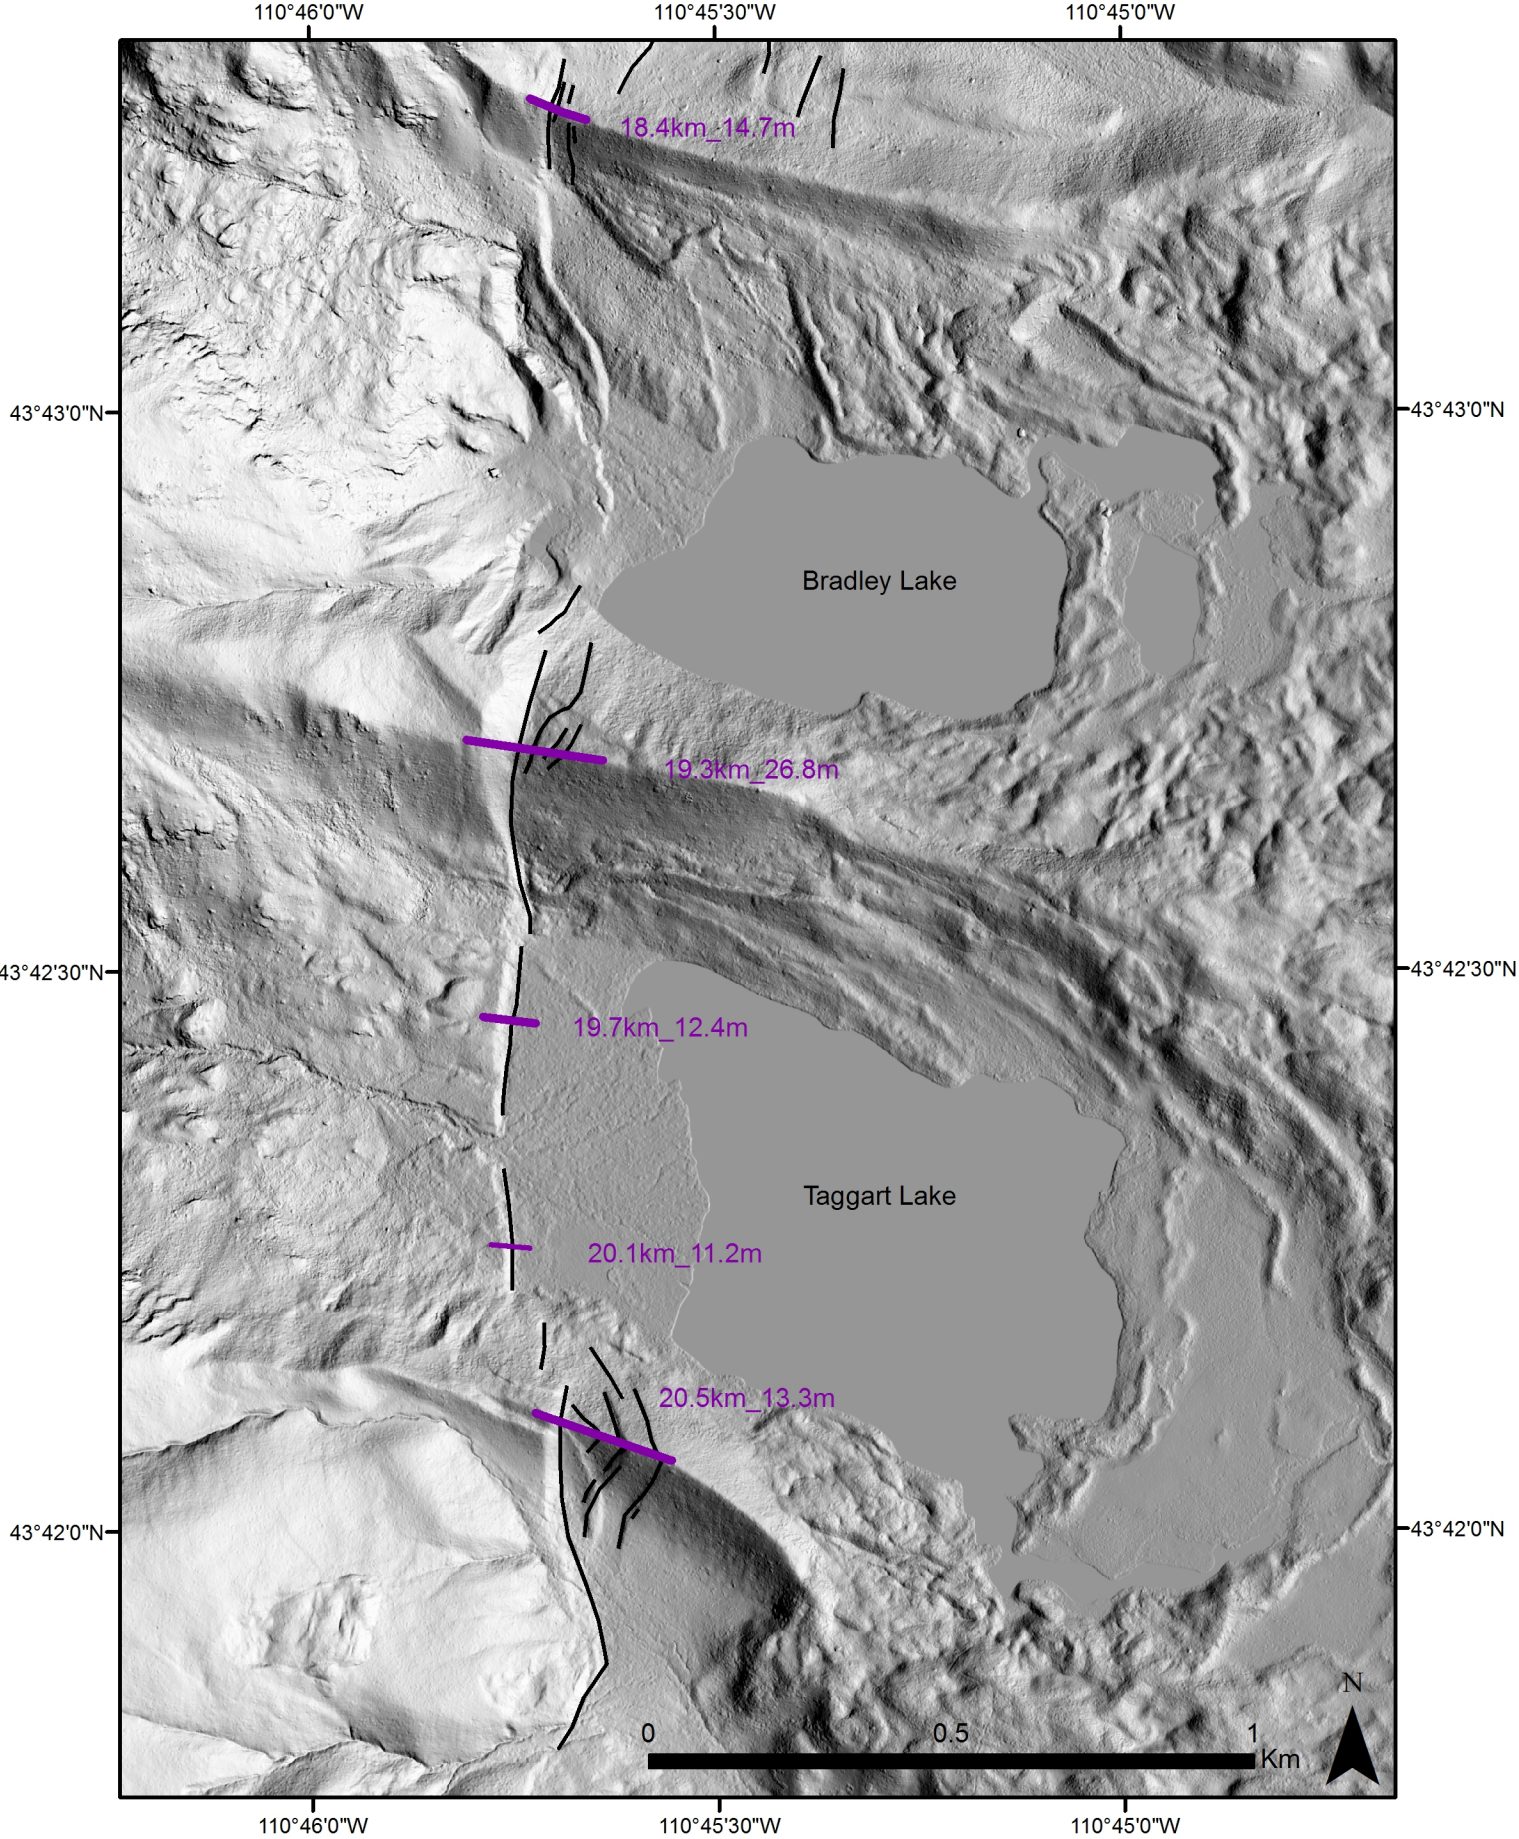



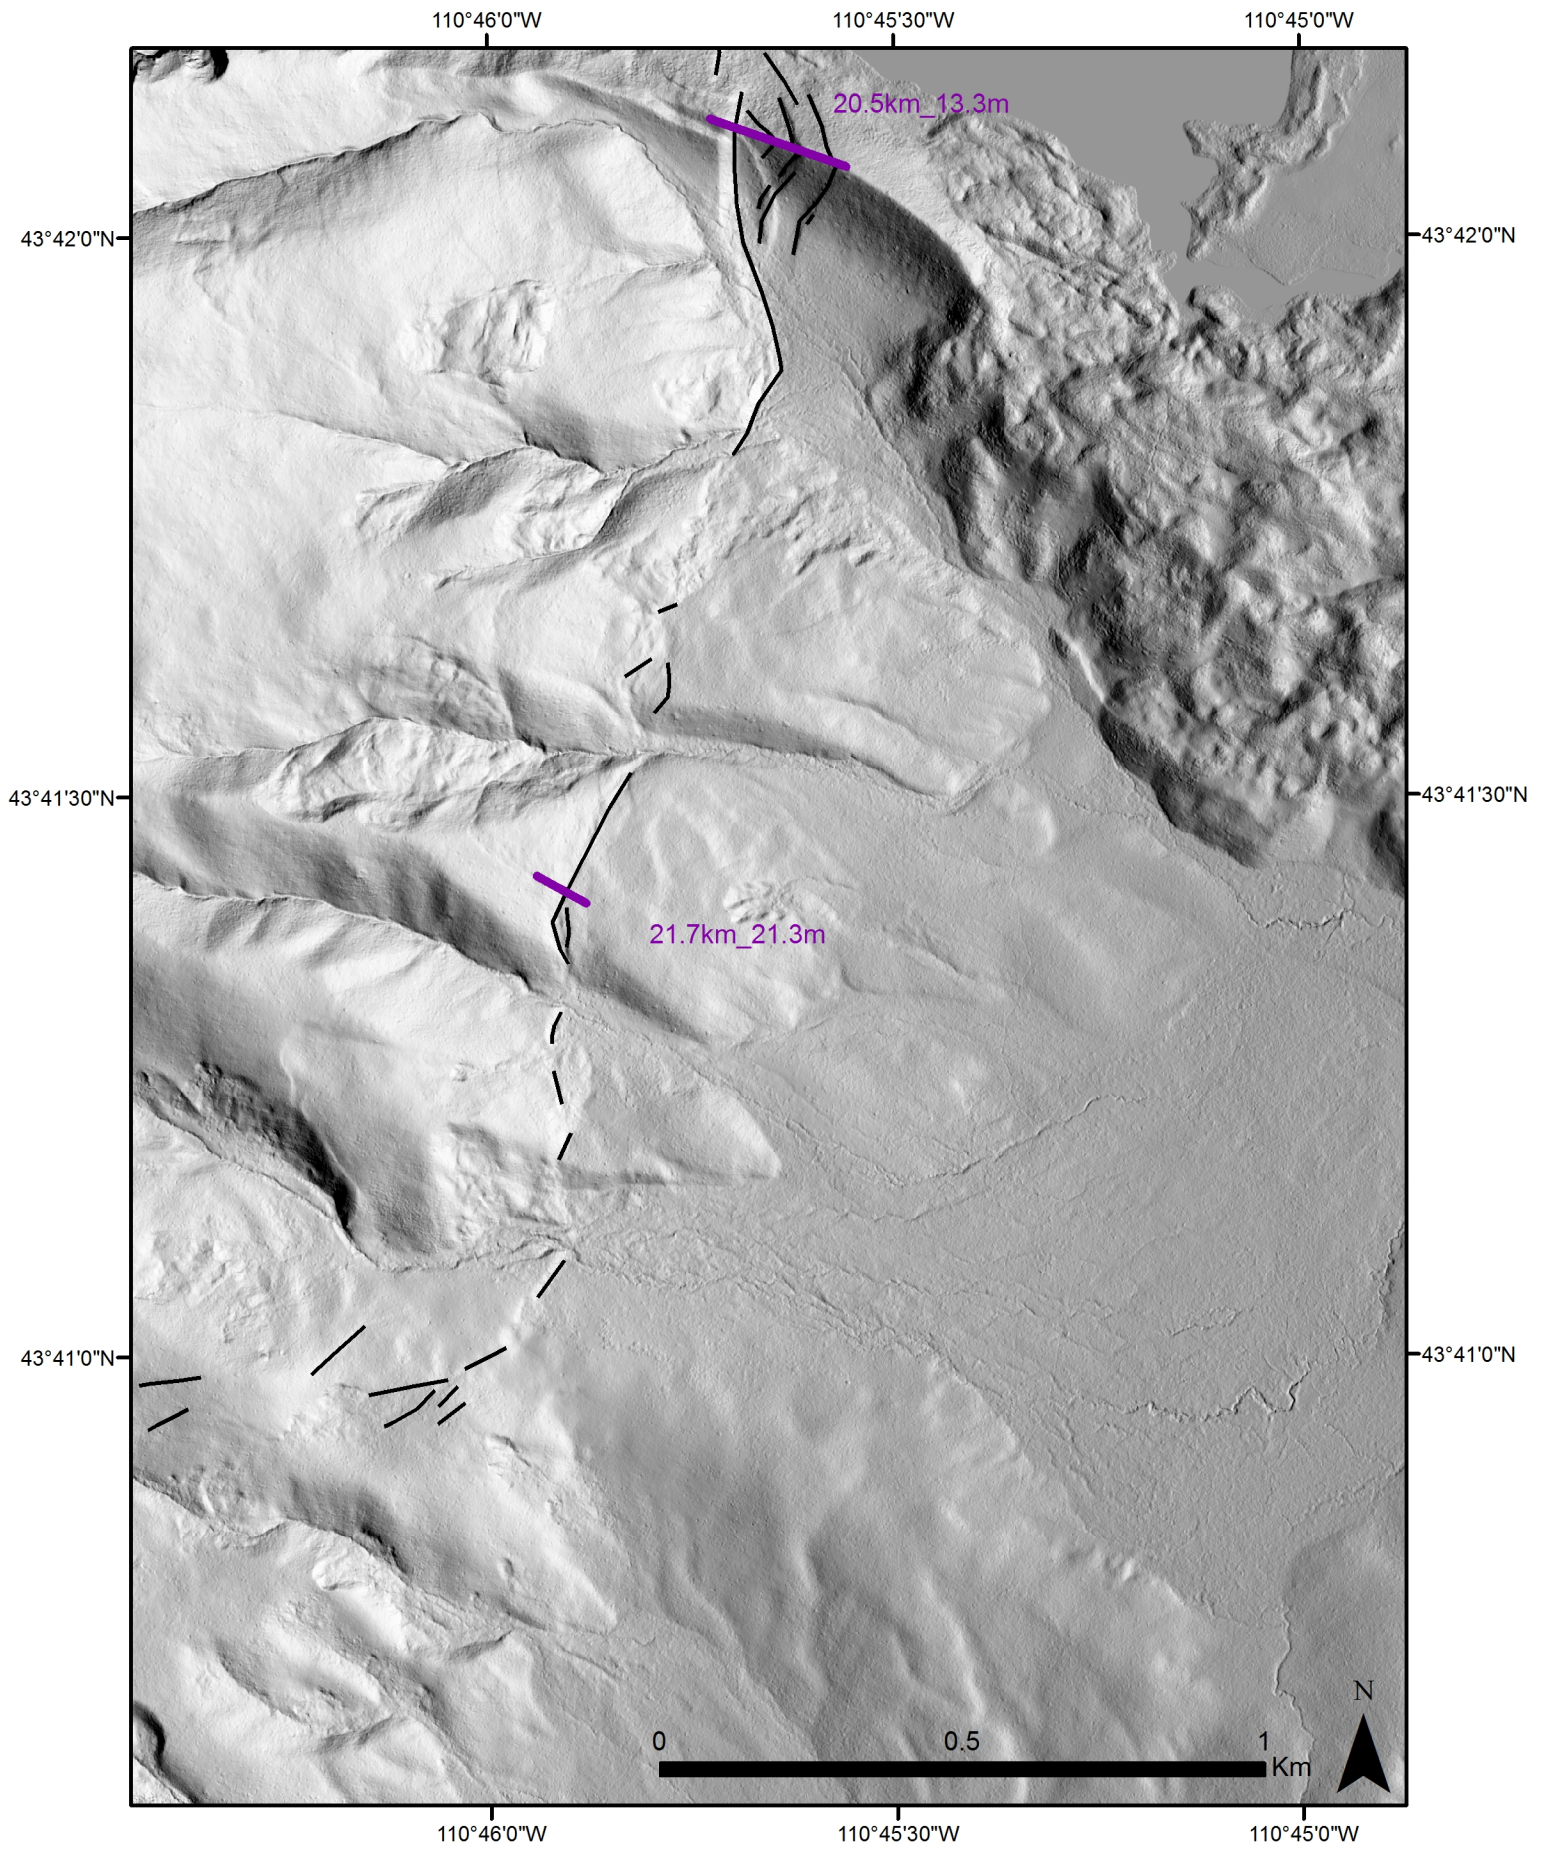



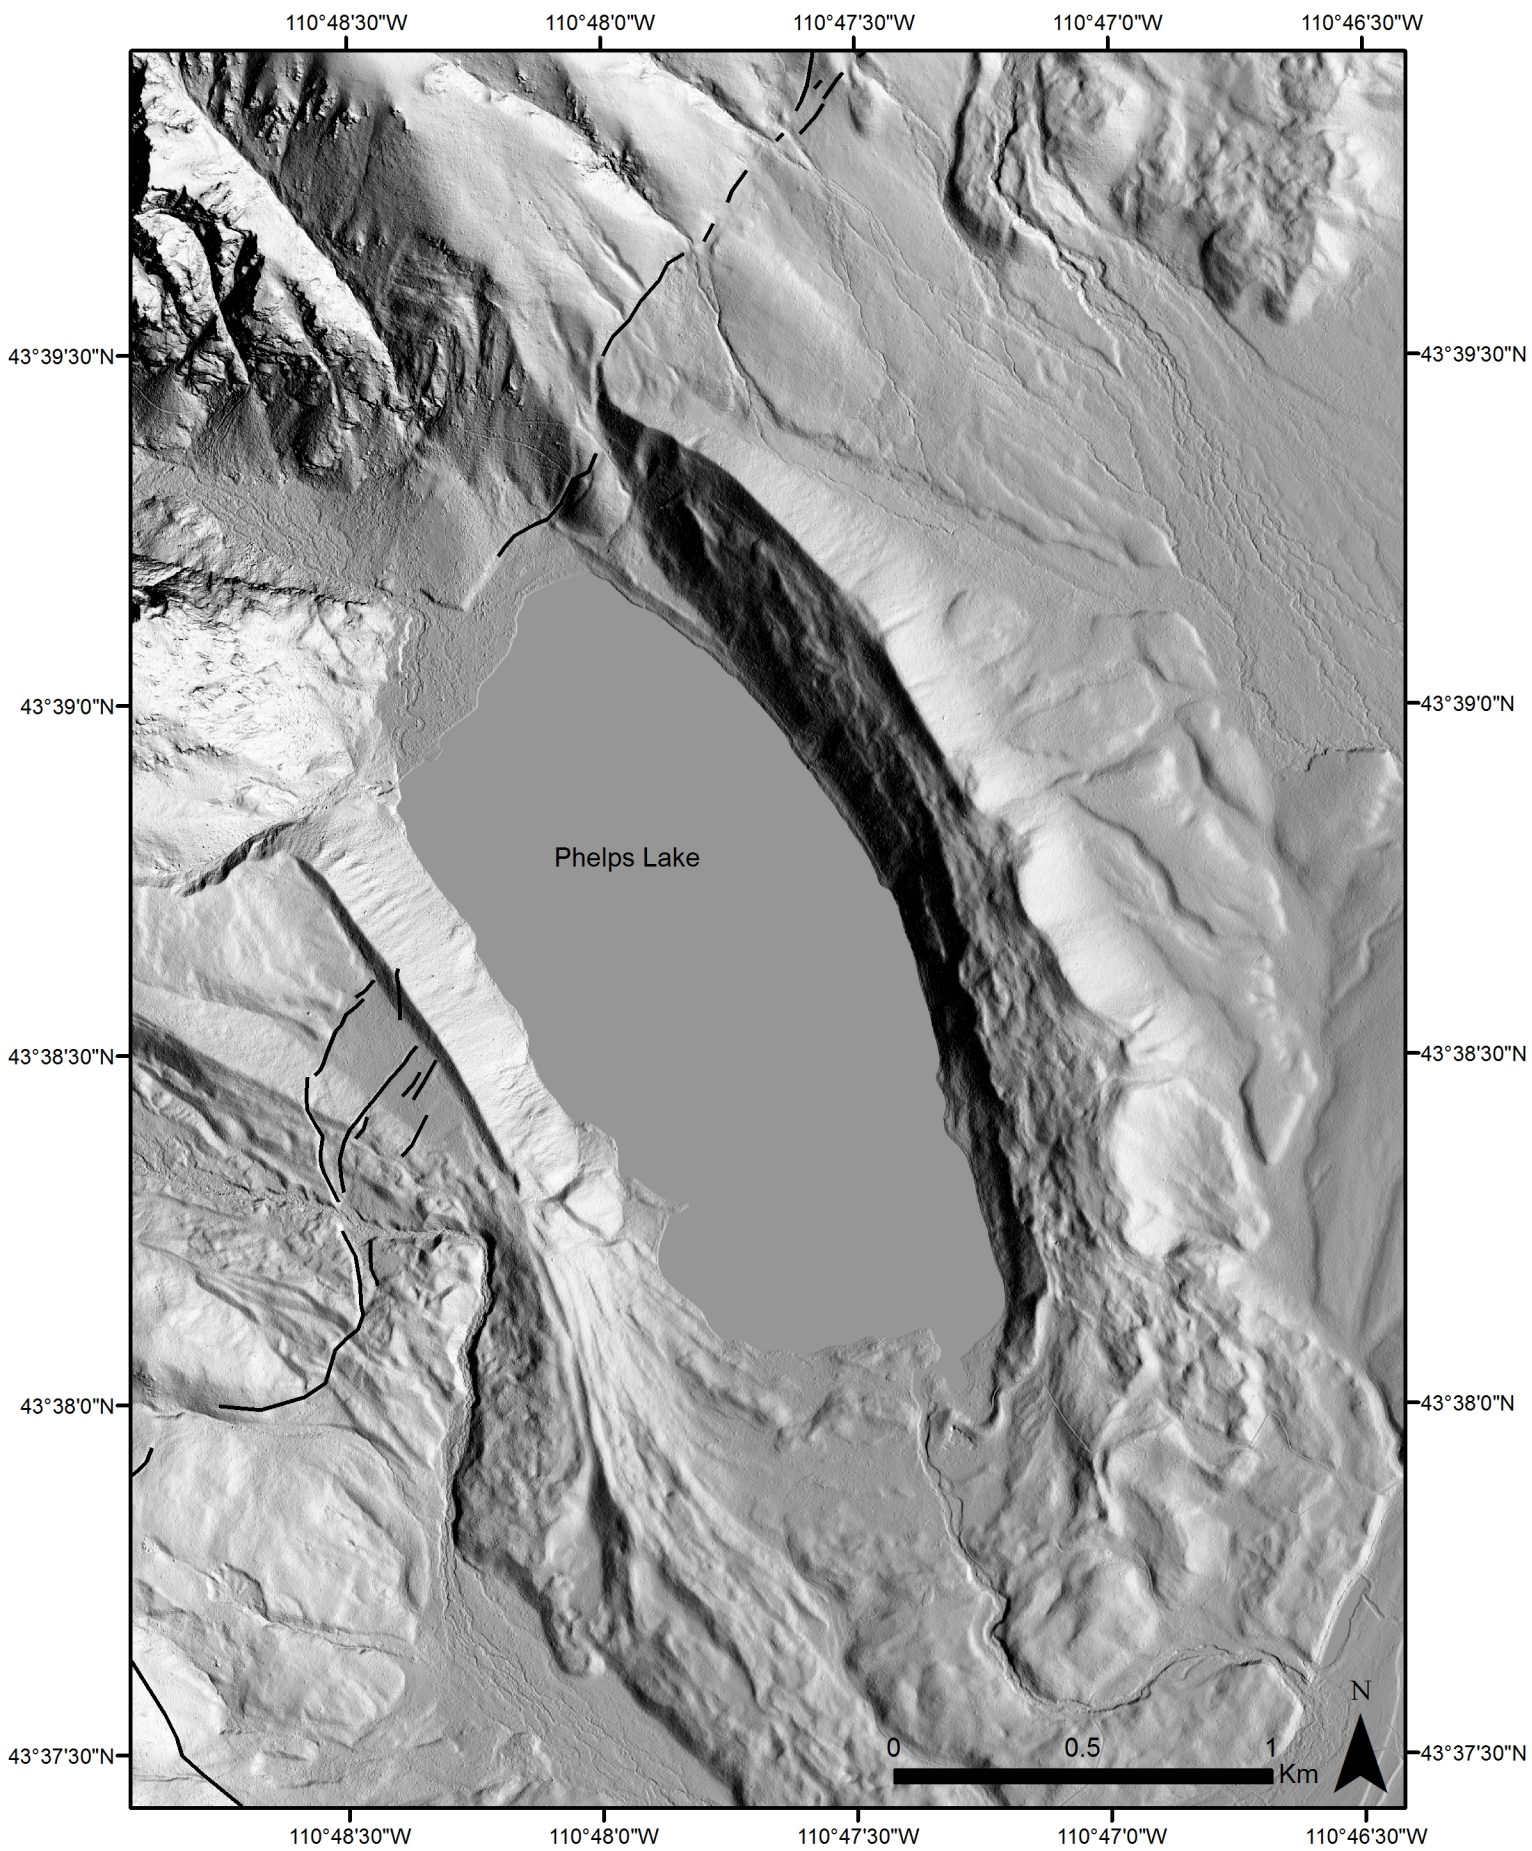



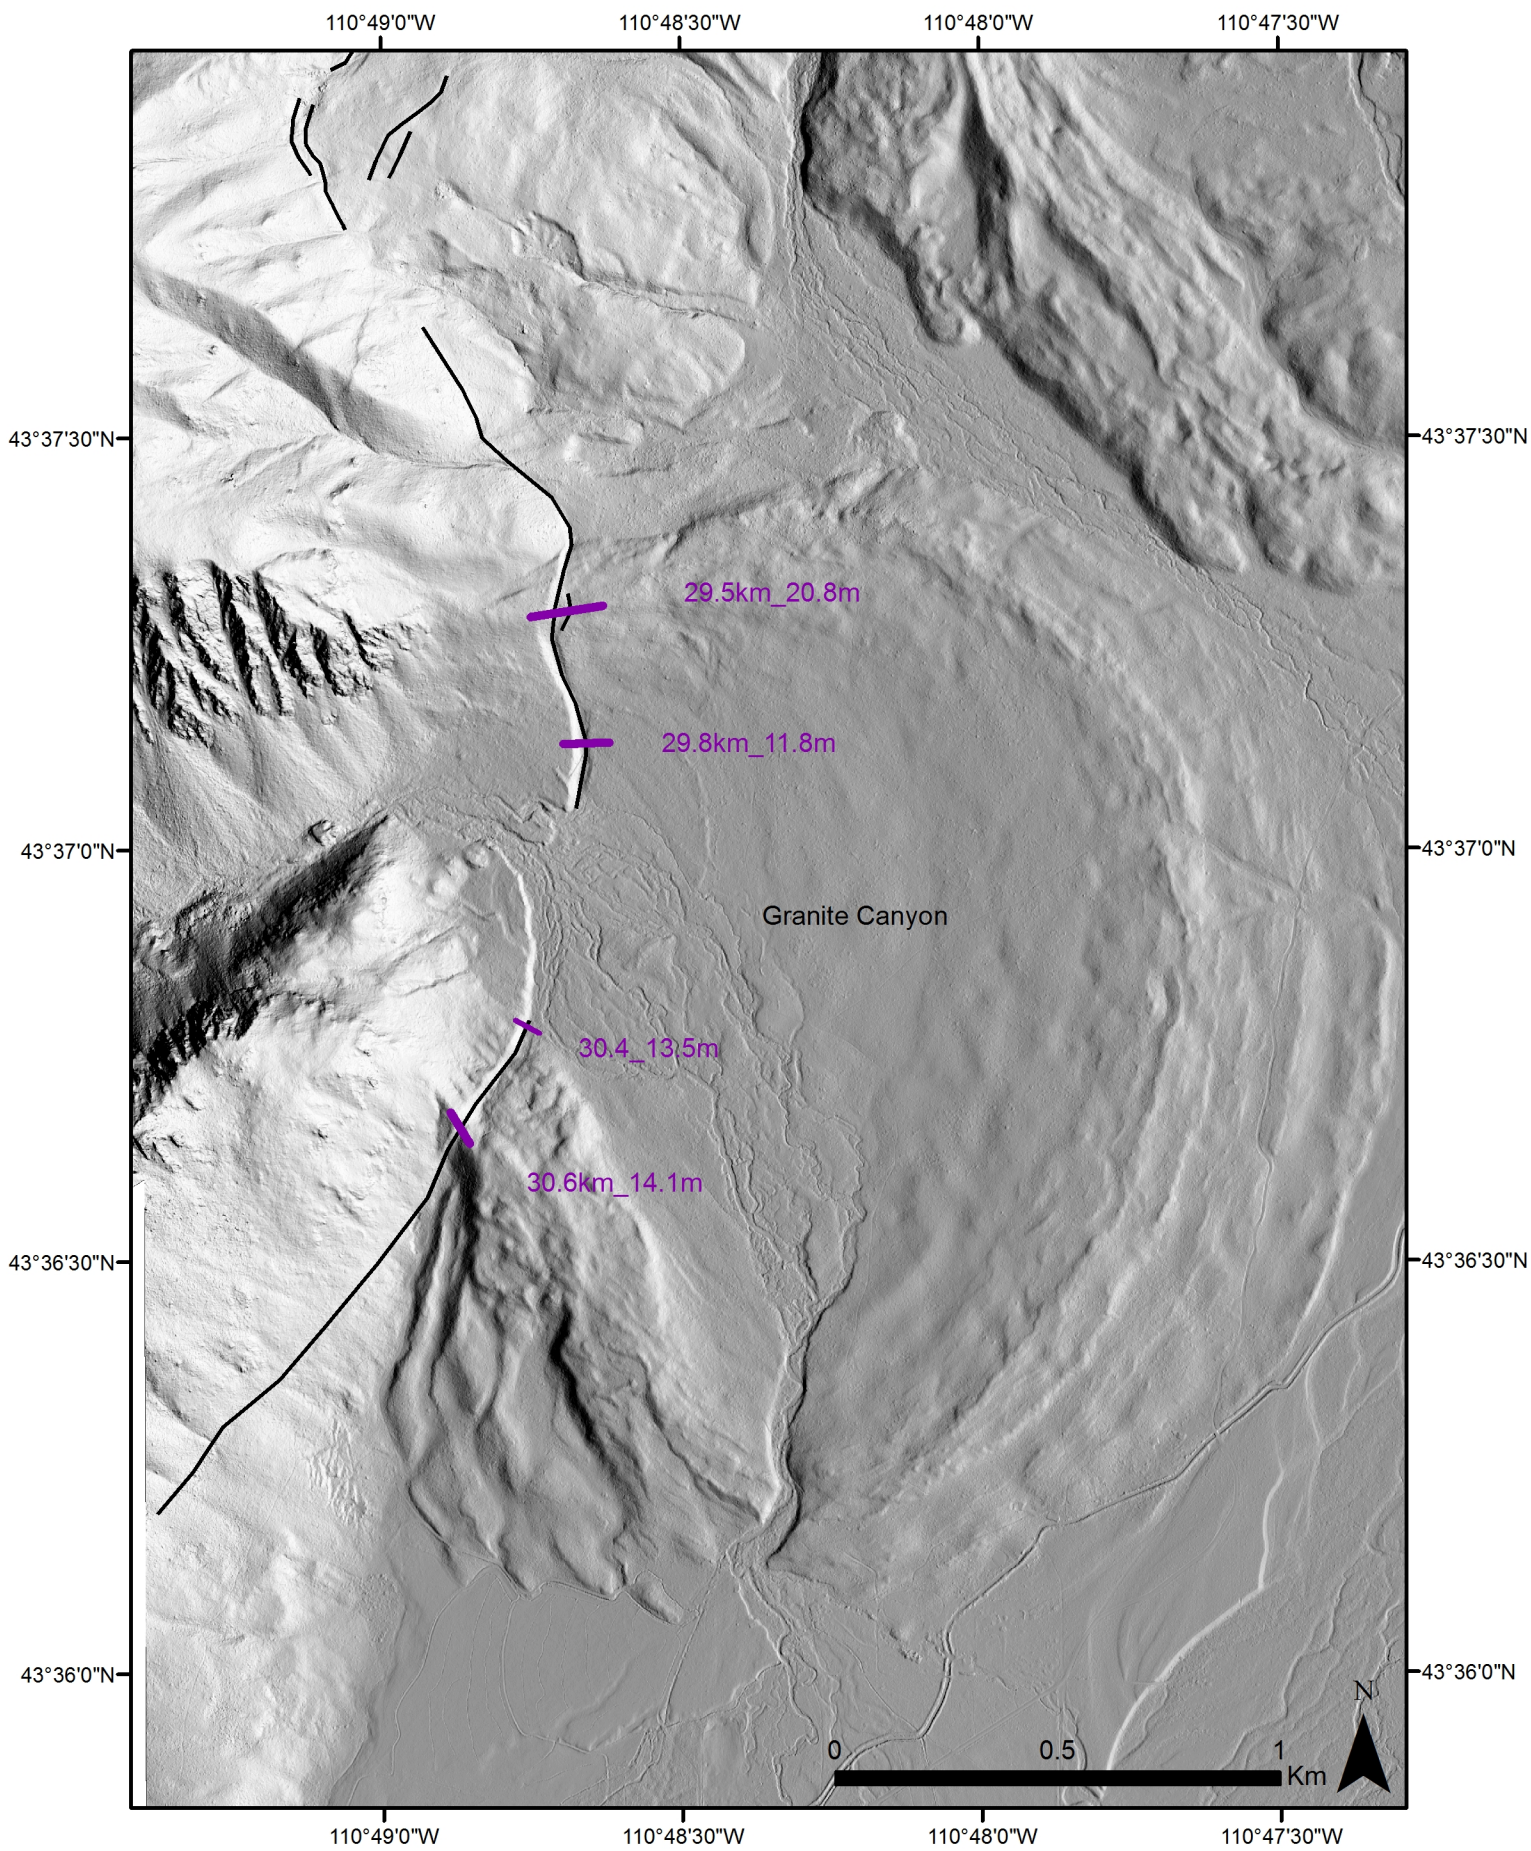

Supplement: Supplementary file 3 [file 22410123]
